# Supplementary material
Source: PubMed Central journal article supplement (PMC6376326)
Supplement: EMBJ-38-e99984-s001.pdf [file EMBJ-38-e99984-s001.pdf]

## Expanded View Figures

**Figure EV1. *Lgr5*-negative/*Krt19*<sup>+</sup> and *Atoh1*<sup>+</sup> cells show colonic epithelium renewal capacity in homeostasis and injury.**

- A Illustration of experimental protocol outlining DT treatment of *Krt19*<sup>BAC-CreERT2</sup>;*ROSA*<sup>tdTomato</sup>;*Lgr5*<sup>DTR-GFP</sup> mice.
- B, C In control conditions and after *Lgr5*<sup>+</sup> stem cell ablation, *Krt19*<sup>+</sup> cells form crypt ribbons and give rise to new *Lgr5*<sup>+</sup> stem cells (*N* = 2 per time point).
- D Illustration of experimental protocol outlining DT treatment of *Krt19*<sup>BAC-CreERT2</sup> or *Atoh1*<sup>CreERT2</sup> mice.
- E, F Rare proliferating *Krt19*<sup>+</sup> or *Atoh1*<sup>+</sup> cells (insets, arrowheads) are found in the transit-amplifying zone of control crypts, and none are present at the bottom of crypts. At d4 of DT treatment, more proliferating *Krt19*<sup>+</sup> or *Atoh1*<sup>+</sup> cells (insets, arrowheads) are found in the transit-amplifying zone and the crypts are devoid of proliferating cells. By d8 of DT treatment, proliferating *Atoh1*<sup>+</sup> cells (insets, arrowheads) are found at the bottom of crypts.

Data information: Scale bars (B, E) = 45 μm; scale bars (F) = 50 μm. Data are represented as mean ± SEM.

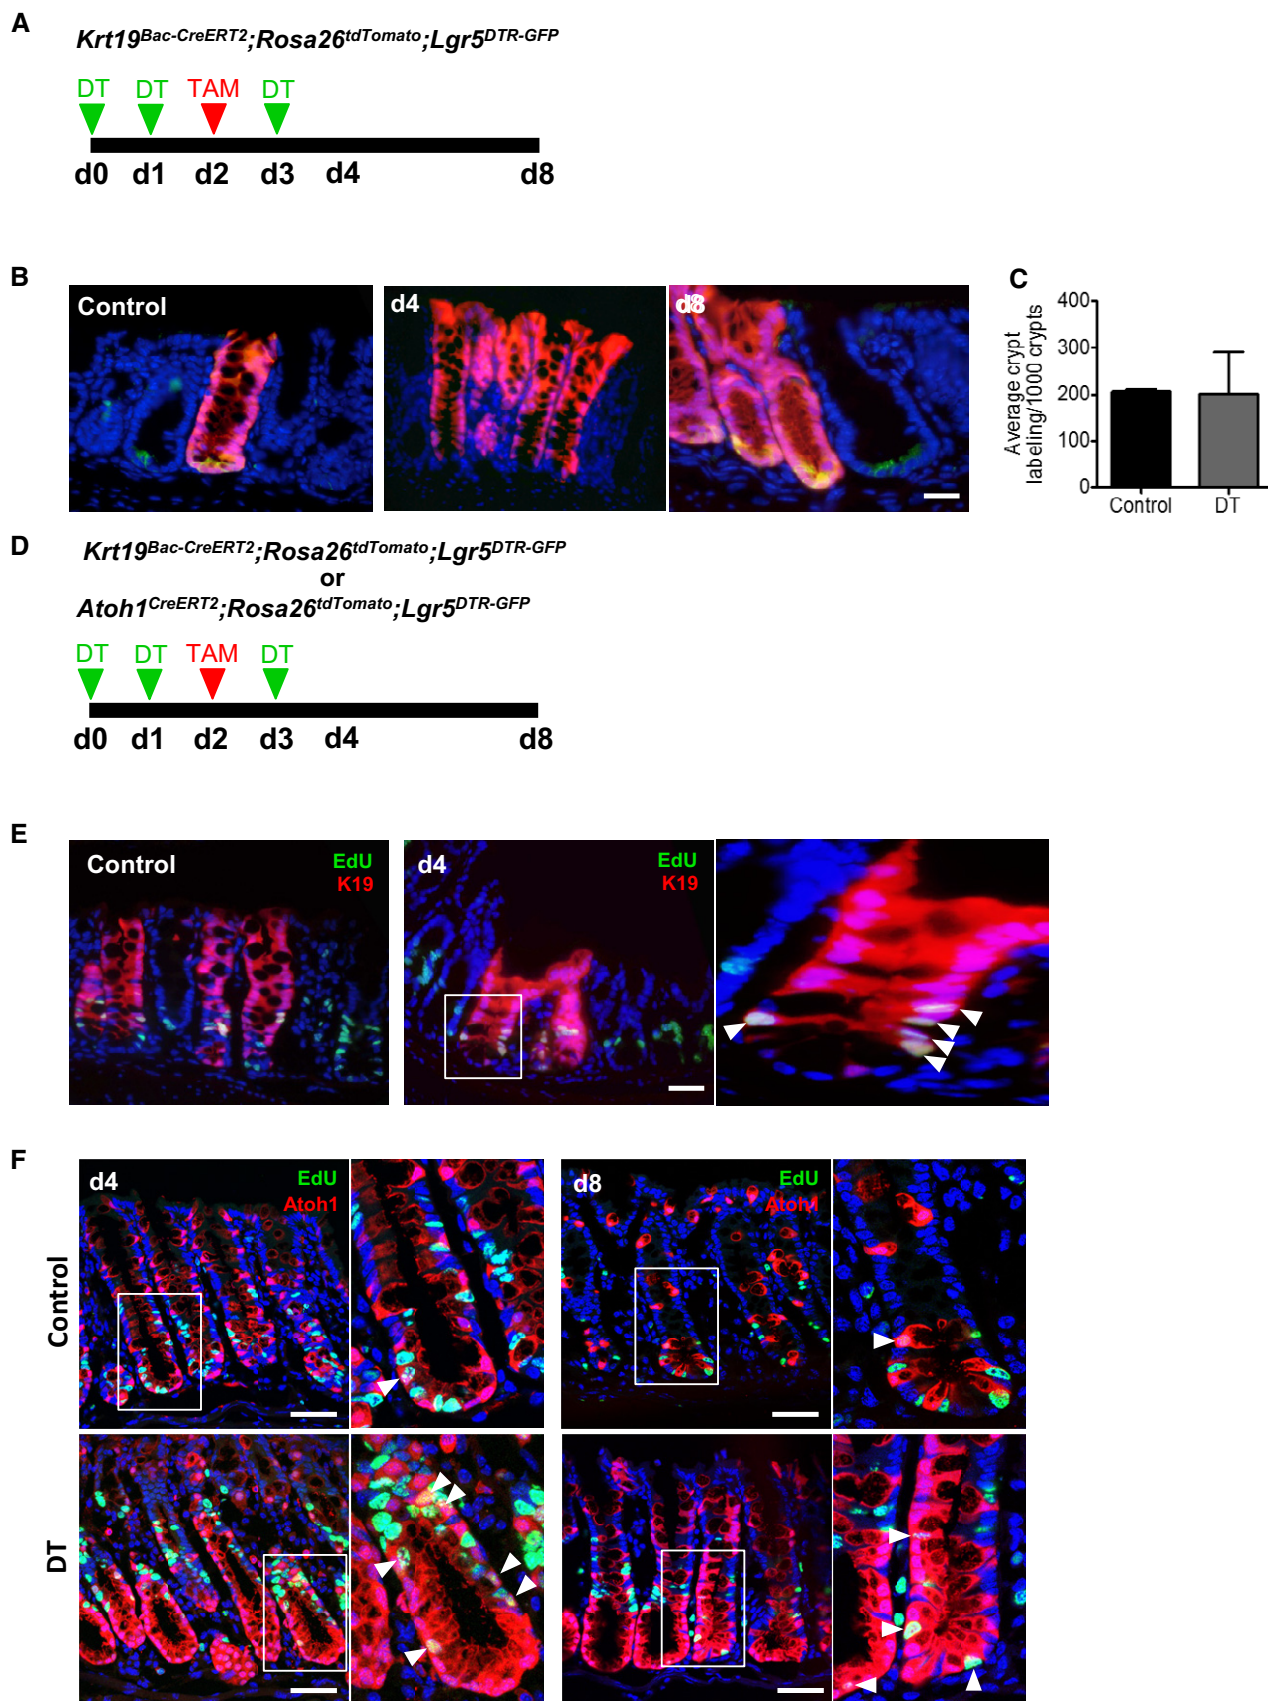

Figure EV1.

**Figure EV2. Krt19-expressing cells include multiple secretory cell types in the colon and small intestine.**

- A Illustration of experimental protocol outlining tamoxifen induction of *Krt19*<sup>BAC-CreERT2</sup>;*ROSA26*<sup>tdTomato</sup> mice.
- B Immunofluorescence staining showing co-localization of *Krt19*<sup>+</sup> cells with *ChgA*<sup>+</sup>, *Dclk1*<sup>+</sup>, and *Muc2*<sup>+</sup> secretory cells in the small intestine and colon (arrowheads).
- C Illustration of experimental protocol outlining DSS-induced colitis in wild-type mice.
- D Effects of DSS colitis on RNA expression levels of various secretory (*Prox1*, *Neurog3*, *Bmi1*) cell markers. *Neurog3* expression is significantly increased acutely post-DSS (d5), whereas *Prox1* expression is significantly increased during late recovery (d19). *Bmi1* expression is not affected by DSS colitis.

Data information: Scale bars (B) = 100  $\mu$ m. Data are represented as mean  $\pm$  SEM analyzed by one-way ANOVA. \* $P \leq 0.05$ , \*\*\* $P \leq 0.0001$ .

**A** *Krt19*<sup>Bac-CreERT2</sup>;*Rosa26*<sup>tdTomato</sup>

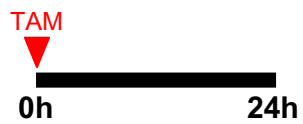

**B**

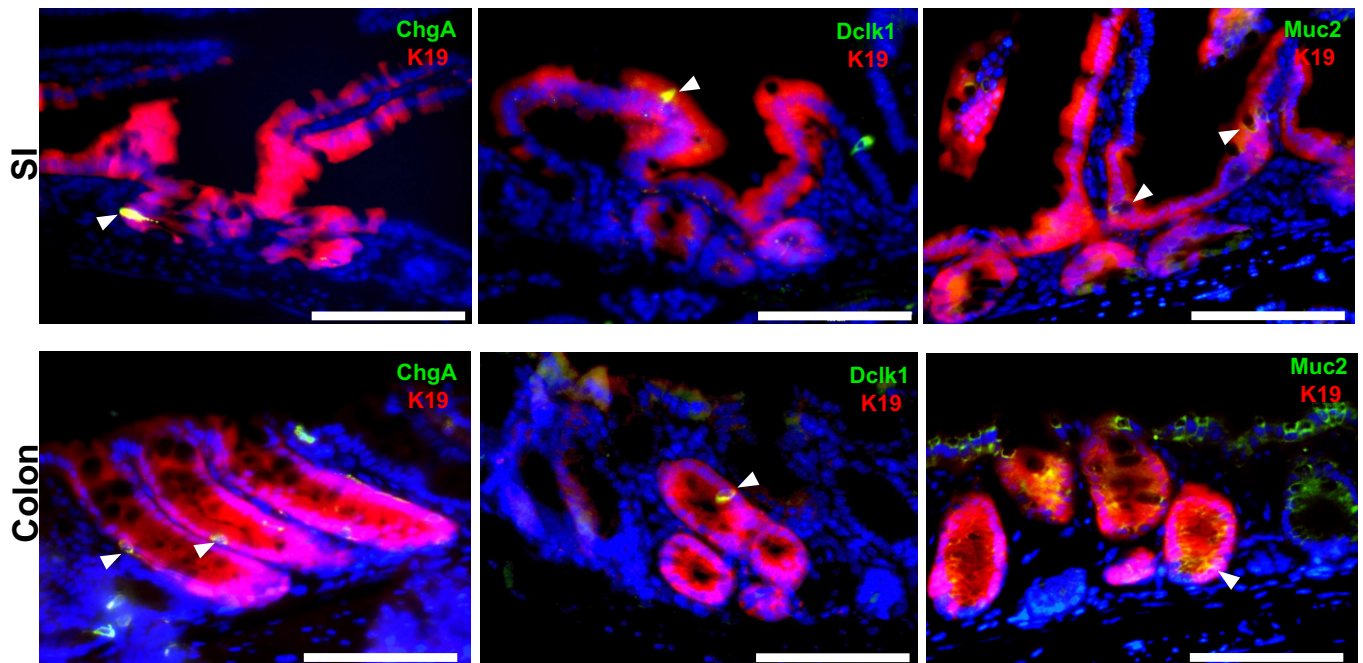

**C** *wt*

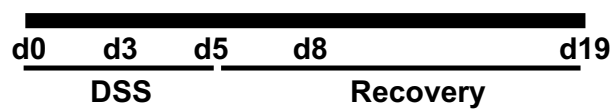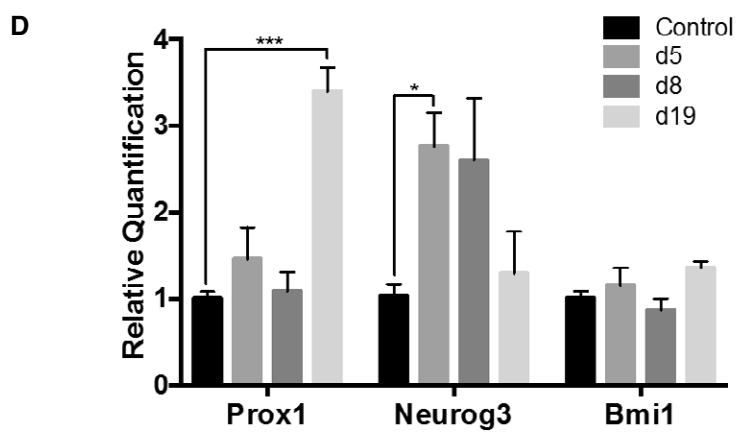

Figure EV2.



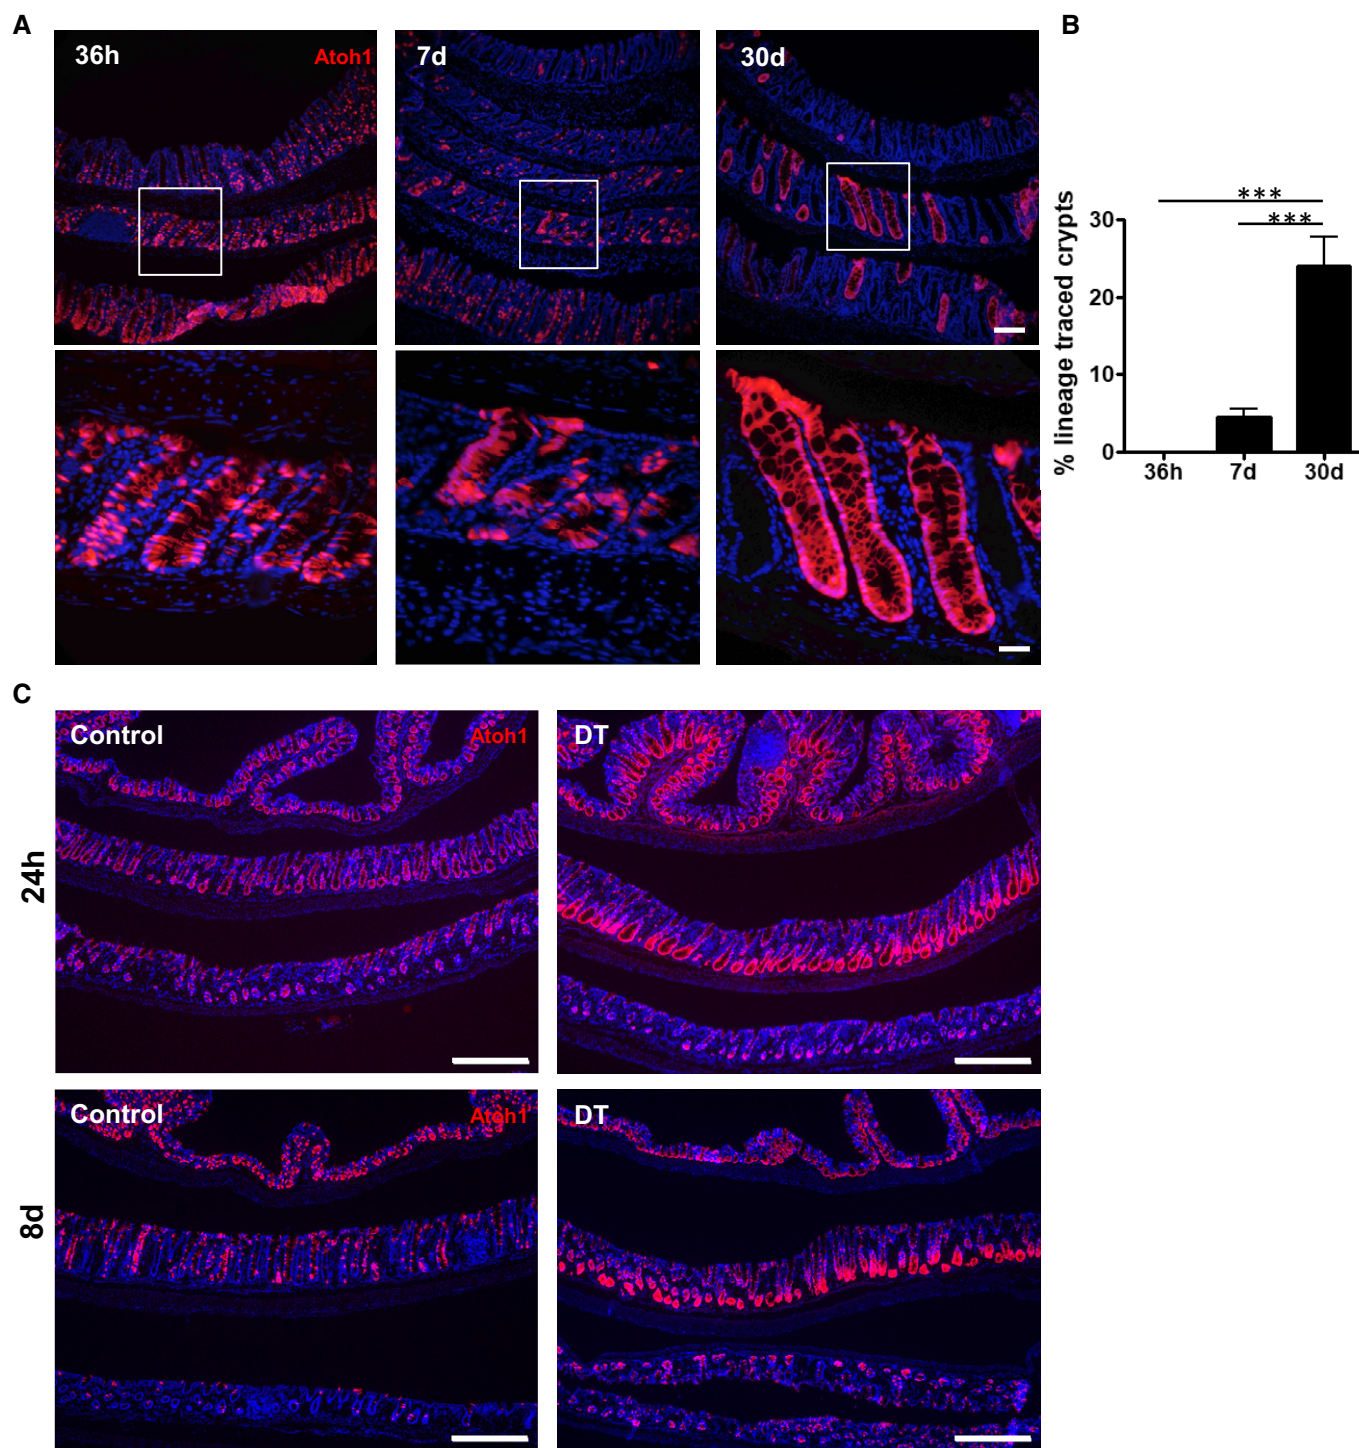

**Figure EV3. Atoh1<sup>+</sup> cells show rare renewal capacity in homeostasis, yet post-injury Atoh1<sup>+</sup> cells acquire stemness.**

A, B Occasionally, Atoh1<sup>+</sup> cells are able to form crypt ribbons that persist up to 30 days after lineage labeling in homeostasis ( $N = 4$  per condition).

C Following DT ablation of *Lgr5*<sup>+</sup> cells, the majority of crypts are renewed and maintained by Atoh1<sup>+</sup> lineage.

Data information: Scale bars (A) = 100  $\mu\text{m}$ ; scale bars (C) = 500  $\mu\text{m}$ . Data are represented as mean  $\pm$  SEM using one-way ANOVA. \*\*\* $P \leq 0.0001$ .

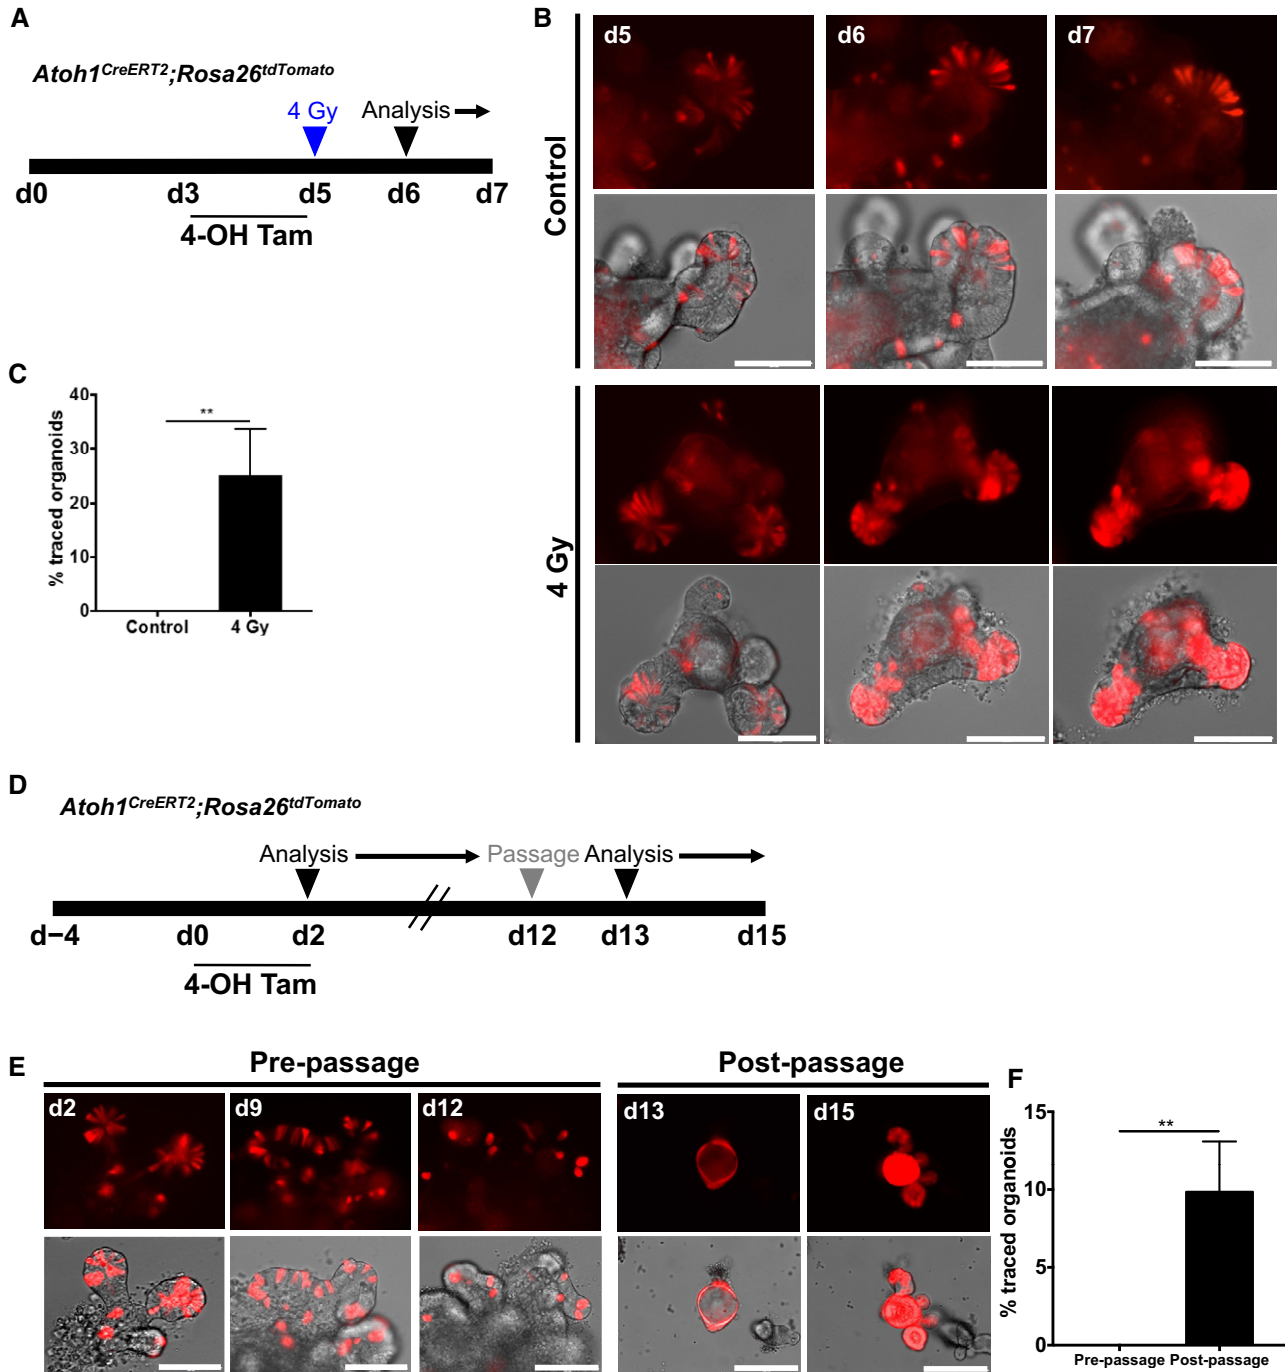

**Figure EV4. Small intestinal *Atoh1*<sup>+</sup> cells show renewal activity following injury *in vitro*.**

A Illustration of experimental protocol outlining 4-OHT induction and irradiation of *Atoh1<sup>CreERT2</sup>;Rosa26<sup>tdTomato</sup>* small intestinal organoids.

B *Atoh1*-tdTomato<sup>+</sup> cells within crypts and villus regions of unirradiated organoids are scattered among tdTomato-negative cells. After irradiation-induced damage, *Atoh1*-tdTomato<sup>+</sup> cells are able to acquire stemness and give rise to fully labeled crypts.

C After radiation-induced damage, 25% of organoids show robust lineage labeling (*N* = 3 control; *N* = 4 irradiated; *n* = 3 technical replicates per condition).

D Illustration of experimental protocol outlining 4-OHT induction of *Atoh1<sup>CreERT2</sup>;Rosa26<sup>tdTomato</sup>* small intestinal organoids.

E, F Pre-passage organoids contain sporadic *Atoh1*-tdTomato<sup>+</sup> cells interspersed between non-labeled cells. Post-passaging, fully labeled spheroids develop into fully labeled organoids (*N* = 3; *n* = 3 technical replicates per condition).

Data information: Scale bars (B, E) = 100  $\mu$ m. Data are represented as mean  $\pm$  SEM analyzed by Student's *t*-test. \*\**P*  $\leq$  0.01.

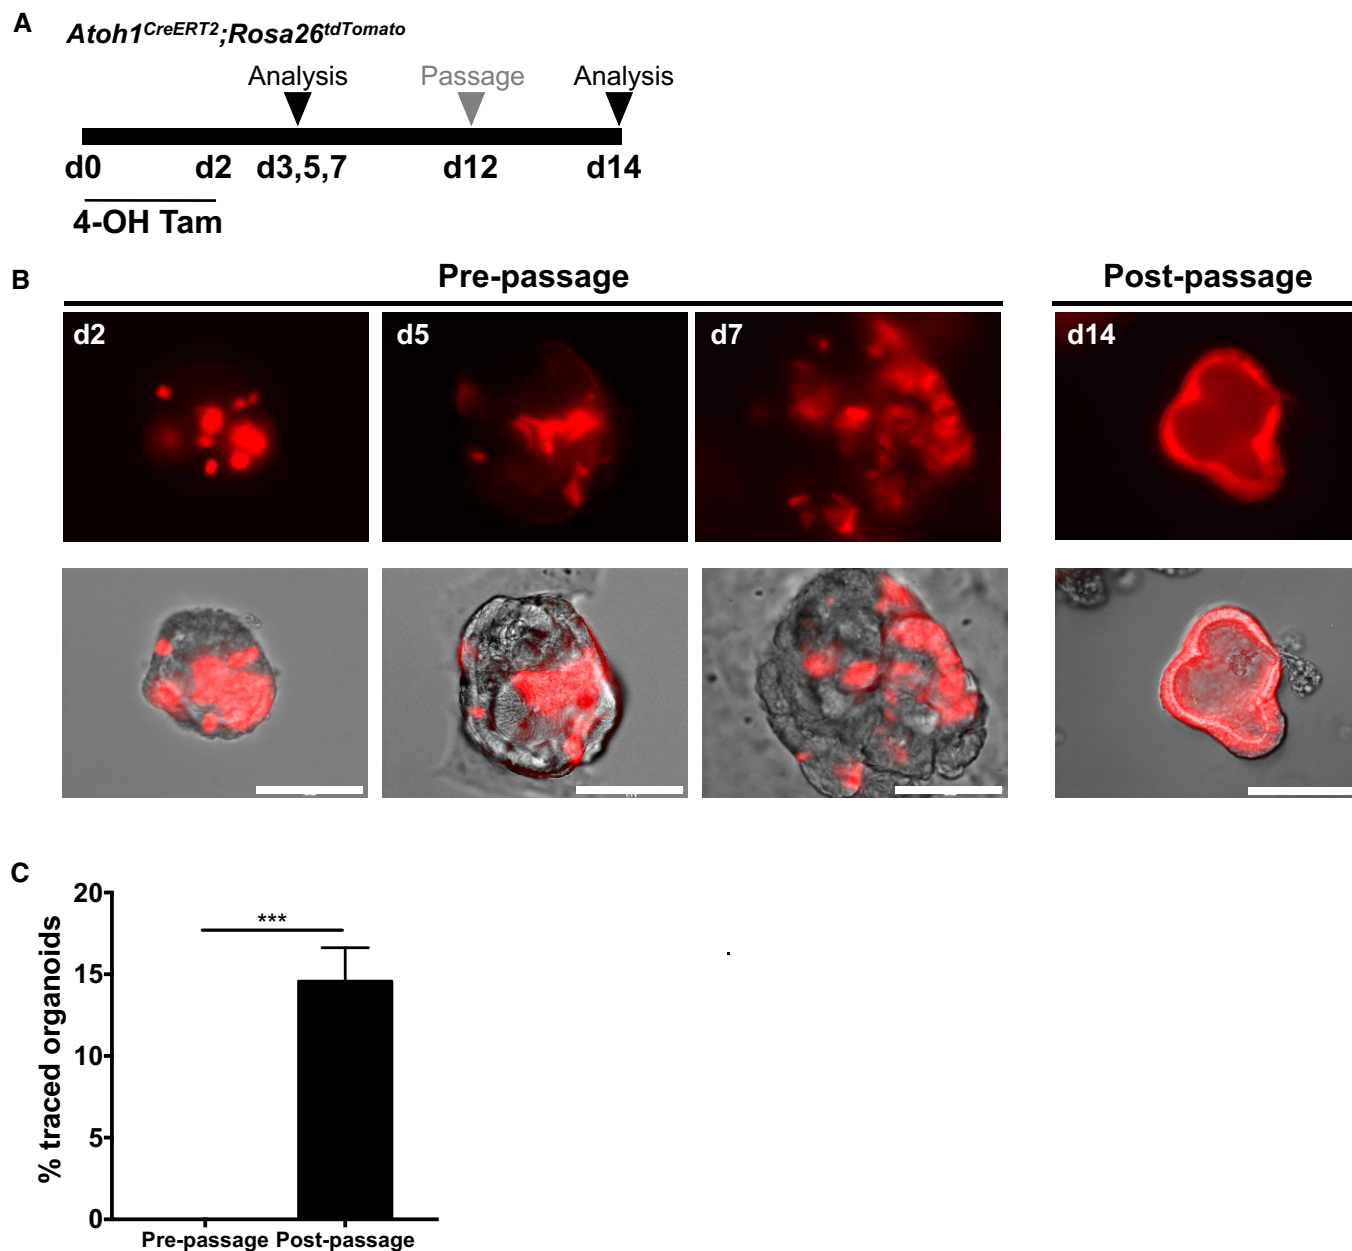

**Figure EV5. *Atoh1*<sup>+</sup> colonic progenitor cells show renewal capacity post-stress induced passaging *in vitro*.**

A Illustration of experimental protocol outlining 4-OHT induction of *Atoh1*<sup>CreERT2</sup>;*Rosa*<sup>tdTomato</sup> colonic organoids.

B, C Pre-passage colonic organoids exhibit lineage labeling of *Atoh1*<sup>+</sup> cells that is limited to single cells. Following passage, *Atoh1*<sup>+</sup> progenitors give rise to fully labeled colonic organoids ( $N = 3$ ;  $n = 3$  technical replicates per condition).

Data information: Scale bars = 100  $\mu$ m. Data are represented as mean  $\pm$  SEM analyzed using Student's t-test. \*\*\* $P \leq 0.0001$ .
